# Supplementary material for: Efficacy of a Parent-Based, Indicated Prevention for Anorexia Nervosa: Randomized Controlled Trial
Source: PubMed Central journal article supplement (PMC6315221; doi:10.2196/jmir.9464), 2018-12-14
Supplement: jmir_v20i12e296_app1.pdf [file jmir_v20i12e296_app1.pdf]

| Primary Outcomes           |     |      |                |       |        |        |        |
|----------------------------|-----|------|----------------|-------|--------|--------|--------|
|                            |     |      | T0 (Screening) | T1    | T2     | T3     | T4     |
| % EBW                      | E@T | N    | 32             | 32    | 16     | 12     | 11     |
|                            |     | mean | 94,92          | 98,77 | 101,84 | 103,17 | 103,40 |
|                            |     | SD   | 12,74          | 12,30 | 13,52  | 16,80  | 17,81  |
|                            | CG  | N    | 33             | 34    | 26     | 18     | 14     |
|                            |     | mean | 95,12          | 99,13 | 96,45  | 93,66  | 93,50  |
|                            |     | SD   | 11,69          | 13,43 | 12,34  | 11,56  | 10,71  |
| Weight concerns (WCS)      | E@T | N    | 32             | 32    | 16     | 12     | 11     |
|                            |     | mean | 47,81          | 39,32 | 34,69  | 29,86  | 26,21  |
|                            |     | SD   | 24,56          | 22,47 | 18,36  | 18,92  | 19,75  |
|                            | CG  | N    | 33             | 34    | 26     | 18     | 15     |
|                            |     | mean | 53,48          | 40,24 | 35,90  | 26,39  | 20,33  |
|                            |     | SD   | 26,45          | 26,94 | 27,07  | 23,15  | 20,89  |
| EDE restraint              | E@T | N    |                | 32    | 16     | 12     | 11     |
|                            |     | mean |                | 1,22  | 0,86   | 0,63   | 0,62   |
|                            |     | SD   |                | 1,30  | 1,27   | 0,93   | 0,90   |
|                            | CG  | N    |                | 34    | 26     | 18     | 15     |
|                            |     | mean |                | 1,31  | 1,27   | 0,88   | 0,53   |
|                            |     | SD   |                | 1,39  | 1,68   | 1,32   | 0,95   |
| Excessive exercise         | E@T | N    |                | 14    | 5      | 4      | 5      |
|                            |     | mean |                | 10,71 | 24,40  | 9,50   | 10,00  |
|                            |     | SD   |                | 10,34 | 5,77   | 13,23  | 14,14  |
|                            | CG  | N    |                | 15    | 7      | 8      | 2      |
|                            |     | mean |                | 11,53 | 11,00  | 7,13   | 17,50  |
|                            |     | SD   |                | 10,72 | 10,39  | 6,96   | 3,54   |
| Secondary Outcomes         |     |      |                |       |        |        |        |
|                            |     |      | T0 (Screening) | T1    | T2     | T3     | T4     |
| EDE weight concern         | E@T | N    |                | 32    | 16     | 12     | 11     |
|                            |     | mean |                | 1,81  | 1,44   | 1,52   | 1,33   |
|                            |     | SD   |                | 1,54  | 1,32   | 1,63   | 1,24   |
|                            | CG  | N    |                | 34    | 26     | 18     | 15     |
|                            |     | mean |                | 1,83  | 1,59   | 1,30   | 0,97   |
|                            |     | SD   |                | 1,59  | 1,69   | 1,38   | 1,33   |
| EDE shape concern          | E@T | N    |                | 32    | 16     | 12     | 11     |
|                            |     | mean |                | 1,86  | 1,57   | 1,87   | 1,39   |
|                            |     | SD   |                | 1,54  | 1,35   | 1,65   | 1,00   |
|                            | CG  | N    |                | 34    | 26     | 18     | 15     |
|                            |     | mean |                | 2,03  | 1,84   | 1,41   | 1,11   |
|                            |     | SD   |                | 1,59  | 1,80   | 1,41   | 1,41   |
| EDE eating concern         | E@T | N    |                | 32    | 16     | 12     | 11     |
|                            |     | mean |                | 0,73  | 0,49   | 0,50   | 0,62   |
|                            |     | SD   |                | 0,92  | 0,58   | 0,94   | 1,55   |
|                            | CG  | N    |                | 34    | 26     | 18     | 15     |
|                            |     | mean |                | 0,84  | 0,80   | 0,47   | 0,29   |
|                            |     | SD   |                | 1,03  | 1,29   | 0,69   | 0,42   |
| EDI-2 drive for thinness   | E@T | N    | 32             | 32    | 16     | 12     | 11     |
|                            |     | mean | 23,50          | 17,16 | 14,63  | 15,92  | 14,00  |
|                            |     | SD   | 9,19           | 6,19  | 5,19   | 5,65   | 4,10   |
|                            | CG  | N    | 34             | 34    | 26     | 18     | 15     |
|                            |     | mean | 24,21          | 18,56 | 17,00  | 14,17  | 12,13  |
|                            |     | SD   | 10,06          | 7,44  | 8,04   | 7,52   | 6,05   |
| EDI-2 body dissatisfaction | E@T | N    |                | 31    | 16     | 12     | 11     |
|                            |     | mean |                | 19,77 | 18,31  | 19,25  | 16,55  |
|                            |     | SD   |                | 7,14  | 8,08   | 8,34   | 4,63   |
|                            | CG  | N    |                | 34    | 26     | 18     | 15     |
|                            |     | mean |                | 21,47 | 20,38  | 17,11  | 14,00  |
|                            |     | SD   |                | 8,74  | 9,36   | 8,84   | 5,86   |
| EDE total                  | E@T | N    |                | 32    | 16     | 12     | 11     |
|                            |     | mean |                | 1,41  | 1,09   | 1,13   | 0,99   |
|                            |     | SD   |                | 1,20  | 1,02   | 1,14   | 0,96   |
|                            | CG  | N    |                | 34    | 26     | 18     | 15     |
|                            |     | mean |                | 1,50  | 1,38   | 1,02   | 0,73   |
|                            |     | SD   |                | 1,32  | 1,54   | 1,10   | 0,91   |
| Body mass index (BMI)      | E@T | N    | 32             | 32    | 16     | 12     | 11     |
|                            |     | mean | 18,43          | 19,32 | 20,35  | 20,85  | 21,21  |
|                            |     | SD   | 2,84           | 2,69  | 2,99   | 3,55   | 3,92   |
|                            | CG  | N    | 33             | 34    | 26     | 18     | 14     |
|                            |     | mean | 18,37          | 19,26 | 19,01  | 18,70  | 18,82  |
|                            |     | SD   | 2,39           | 2,61  | 2,57   | 2,36   | 2,21   |
