# Supplementary material for: Efficacy of a Parent-Based, Indicated Prevention for Anorexia Nervosa: Randomized Controlled Trial
Source: PubMed Central journal article supplement (PMC6315221; doi:10.2196/jmir.9464), 2018-12-14
Supplement: jmir_v20i12e296_app2.pdf [file jmir_v20i12e296_app2.pdf]

|                          |     |      | T1    | T2    | T3    | T4    |
|--------------------------|-----|------|-------|-------|-------|-------|
| Parent motivation (PMI)  | E@T | N    | 31    |       |       |       |
|                          |     | mean | 79,84 |       |       |       |
|                          |     | SD   | 23,17 |       |       |       |
|                          | CG  | N    | 34    |       |       |       |
|                          |     | SD   | 21,9  |       |       |       |
|                          |     | mean | 76,24 |       |       |       |
| Child EDE restraint      | E@T | N    | 32    | 17    | 12    | 11    |
|                          |     | mean | 0,99  | 0,38  | 0,73  | 0,62  |
|                          |     | SD   | 1,41  | 0,58  | 1,14  | 0,86  |
|                          | CG  | N    | 34    | 26    | 18    | 15    |
|                          |     | mean | 0,84  | 0,70  | 0,66  | 0,34  |
|                          |     | SD   | 1,39  | 1,41  | 1,53  | 1,09  |
| Child EDE eating concern | E@T | N    | 32    | 17    | 12    | 11    |
|                          |     | mean | 0,36  | 0,18  | 0,45  | 0,47  |
|                          |     | SD   | 0,78  | 0,31  | 0,68  | 0,59  |
|                          | CG  | N    | 34    | 26    | 18    | 15    |
|                          |     | mean | 0,34  | 0,31  | 0,21  | 0,08  |
|                          |     | SD   | 0,74  | 0,83  | 0,38  | 0,22  |
| Child EDE weight concern | E@T | N    | 32    | 17    | 12    | 11    |
|                          |     | mean | 1,48  | 1,33  | 1,39  | 1,64  |
|                          |     | SD   | 1,32  | 1,10  | 1,19  | 1,33  |
|                          | CG  | N    | 34    | 26    | 18    | 15    |
|                          |     | mean | 1,38  | 1,11  | 0,94  | 0,93  |
|                          |     | SD   | 1,55  | 1,32  | 1,09  | 1,04  |
| Child EDE shape concern  | E@T | N    | 32    | 17    | 12    | 11    |
|                          |     | mean | 1,42  | 1,48  | 1,75  | 1,77  |
|                          |     | SD   | 1,17  | 1,15  | 1,33  | 1,29  |
|                          | CG  | N    | 34    | 26    | 18    | 15    |
|                          |     | mean | 1,40  | 1,28  | 1,03  | 1,01  |
|                          |     | SD   | 1,52  | 1,44  | 1,08  | 1,15  |
| Child EDE total          | E@T | N    | 32    | 17    | 12    | 11    |
|                          |     | mean | 1,06  | 0,84  | 1,08  | 1,13  |
|                          |     | SD   | 1,05  | 0,63  | 0,89  | 0,87  |
|                          | CG  | N    | 34    | 26    | 18    | 15    |
|                          |     | mean | 0,99  | 0,85  | 0,71  | 0,59  |
|                          |     | SD   | 1,22  | 1,17  | 0,94  | 0,82  |
| Child excessive exercise | E@T | N    | 7     | 5     | 2     | 4     |
|                          |     | mean | 10,00 | 13,40 | 14,00 | 7,00  |
|                          |     | SD   | 10,66 | 12,16 | 19,80 | 14,00 |
|                          | CG  | N    | 8     | 4     | 4     | 5     |
|                          |     | mean | 4,50  | 10,00 | 8,00  | 5,20  |
|                          |     | SD   | 5,07  | 14,14 | 8,08  | 7,43  |
